# Supplementary material for: Crystal Structure of the Recombination Mediator Protein RecO from Campylobacter jejuni and Its Interaction with DNA and a Zinc Ion
Source: MDPI journal article supplement (doi:10.3390/ijms23179667), 2022-08-26
Supplement: s1 [file s1]

**Figure S1**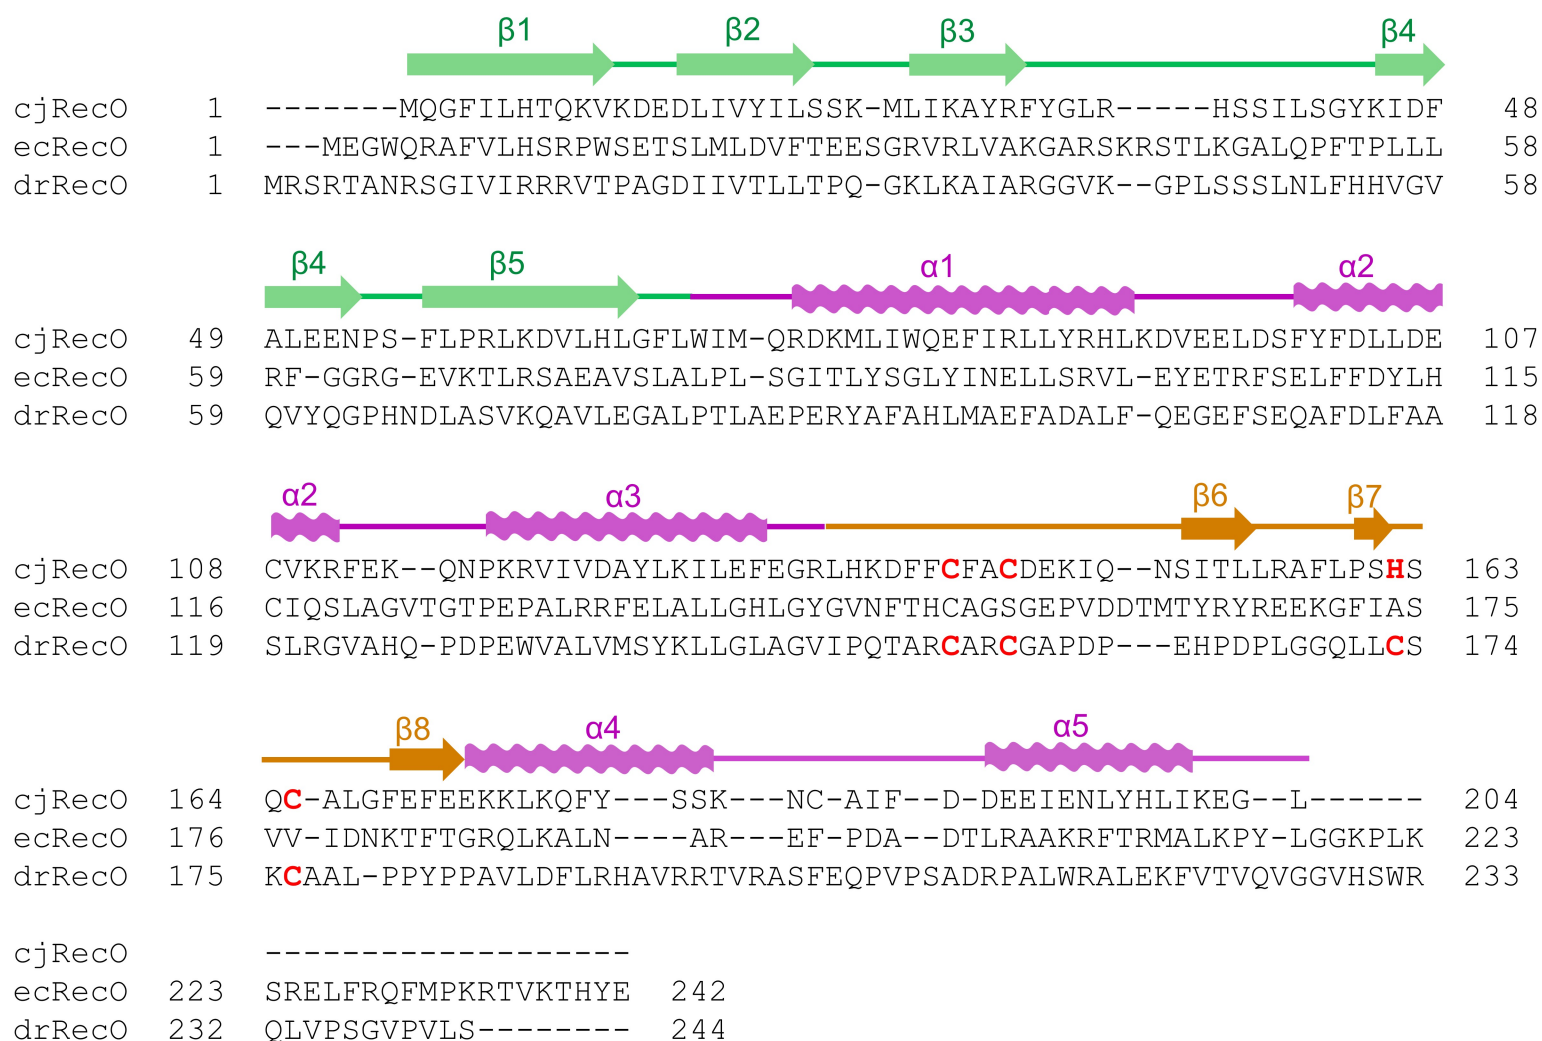

**Figure S1.** Structure-based sequence alignment of cjRecO, ecRecO, and drRecO. The Zn<sup>2+</sup>-coordinating residues of cjRecO and drRecO are colored red. The secondary structures of cjRecO ( $\alpha$ -helices, waves;  $\beta$ -strands, arrows) are shown above the cjRecO sequence in domain-specific colors (NTD, green; CTD, magenta; ZnD, orange). Structure-based sequence alignment was performed using the PROMALS3D program [33].

Figure S2

|        |                                                                   |     |
|--------|-------------------------------------------------------------------|-----|
| cjRecO | -----MQGFILHTQKVKDEDLIVYILSSKMLIKAYRFYGLRHSSILSGYKIDFALE          | 51  |
| hpRecO | -----MQGFLLQTQSIRDEDLIVHILTKNQ LKTL YRFYGRHSVVLNVGRKIDFEE         | 51  |
| rlRecO | -----MQWQDHAI ILGVKRHGETSV LAEVMTRDRGRHLGLVRSGR SR-----           | 42  |
| bsRecO | -----MLTKCEGIVLRTNDYGETNKLIVTLL TREHGKIGVMARGAK-KP-----           | 42  |
| bpRecO | -----MLHSYPYRETS LVIDVL TRDHGRIALVAKGAK-RP-----                   | 34  |
| ecRecO | -----MEGWQRAFVLH SRPWSETS LMLDVFTESGRVRLVAKGAR-SK-----            | 42  |
| vpRecO | MSNL SAEGFQRCFV LHRRPYSESSLILDVFS EYGRLTLMAGAR-SK-----            | 47  |
| drRecO | -MRSRTANRSG-IVIRRRVTPAGDIIVTLLTPQ GK-LKAIARGGVKG P-----           | 45  |
| bbRecO | ----MTQGKDRFI ILKKIKYAEADLI IHGLSPRGEKLA FFIARGALKSK-----         | 44  |
|        |                                                                   |     |
| cjRecO | ENPSFLPRLKDVHLGLFWIMQRDKM--L-----IW                               | 80  |
| hpRecO | NDDKFLPKLRNILLHGYIWEREMERL--F-----FW                              | 80  |
| rlRecO | ---AMQFVLQAGNAVEVIWRARLD-EHLGEFRVEPVT LRAARLMETA-----TAVYG        | 90  |
| bsRecO | -NSRLSAVSQPF LYGSFLMQKTSG---LG-----TLQQGEMILSMRGIREDLFLTAYA       | 91  |
| bpRecO | -HSALRGVLQTFQPLSLSWSGKSE---LR-----TLTGAEWVGGMLPLAGDALL--CG        | 81  |
| ecRecO | -RSTLKGALQPFTPLLLRFGGRGE---VK-----TLRSAEAVSLALPLSGITLY--SG        | 89  |
| vpRecO | -RSNLKGALQPFTPLLLKWSGKGS---MK-----TLRQAEPISLGLPLFGINLY--SA        | 94  |
| drRecO | -LSSSLNL---FHHVGVQVY-QGPHNDLA-----SVKQAVLEGALPTLAEP-ERYAFA        | 92  |
| bbRecO | -KRFGGGVLEP THFVTFTYKQANEHGQLN-----VLQEATIVNDFPGLRTDYDRLETA       | 96  |
|        |                                                                   |     |
| cjRecO | QEFIRLLYRHLKDVEELDSFYFDLLDECVKRFEK--QNPKRVIVDAYLKILEFEGRLHKD      | 138 |
| hpRecO | QRFCALLFRHLEGVHSLDSIYFDTLDDGASKLSK--QHPLRVVLEMYATLLNFEGRLQSY      | 138 |
| rlRecO | VQAMGALLRLLPERDPH-PHLFDALEVILDHLHN-PADAGELFVRFELAVLNDLGFGLDL      | 148 |
| bsRecO | AYVAELVDRGT EKKPN-PYLF EFIEESLKQLNE-GTDPDVITFIVQMKMLGVMGLYPEL     | 149 |
| bpRecO | FYANELLVKFCAREDPH-PPLFQH YLVTLTRLAH-GEPPVQVLR SFERVLRETGYAMTL     | 139 |
| ecRecO | LYINELL SRVLEYETRF-SE LFFDYLHC IQSLAGVTGTPEPALRRFELALLGHLGYGVNF   | 148 |
| vpRecO | MYVNELVGRV LMAEVPM-PALFHDYLHALTELAQ-CENPEPALRRFELALLSSMGYGVDF     | 152 |
| drRecO | HLMAEFADALFQEGE-FSEQAFDLFAASLRGVAH-QPDPEWVALVMSYKLLGLAGVIPQT      | 150 |
| bbRecO | LHILECVSKVSQEGDRDSEFLFNLLGNTLKVLES-TPDILVLKMHFY LKFL LQQGVVNAE    | 155 |
|        |                                                                   |     |
| cjRecO | FFCFACDEKIQNSIT----LLRAFLPSHS-----QCALGF EFEEKKLKQFYS--SK         | 183 |
| hpRecO | HSCFLCDKKLENSVT----LAQGFIL AHP-----SCLKTKSLDLEKIQAFFR--TQ         | 183 |
| rlRecO | AECAATGTRSD--LV--YVSPKSGRAVSRAA-GAPWADKMLLLPPFLS-----IE           | 193 |
| bsRecO | NHCVHC KSQ---DGT FHFVSVRDNGFICHRCFEKDPYRIP- IKPQTARLLRLFY YFDLSRL | 205 |
| bpRecO | KRTVA--RRAVEPDKLYVFD-PQHGV RDAGGDA--PSHWPVIAQTLLDMEEDDY-----      | 189 |
| ecRecO | THCAGSGEPVDDTMTYR YR-EEKGF IASVV-----IDNKTF TGRQLKALNAREF-----    | 196 |
| vpRecO | LHCAGTGE PVAPEMTYR YR-EQKGF IASVR-----RDNLTF LGNELIAISERRF-----   | 200 |
| drRecO | ARCARC GAPDPEH----PDPLGGQL LSKCAALPPYP PAVLD-----FLRHAVRRT        | 197 |
| bbRecO | PWMA PF-----LKTNL-AD SANLISYRQTVDD-----EMYN-VEQM                  | 189 |
|        |                                                                   |     |
| cjRecO | NCAIFDDEEIEN----LYHLIKEGL-----                                    | 204 |
| hpRecO | STIDLETEEVEE----LWRTLNLGF-----                                    | 204 |
| rlRecO | GNHAADFDLSLAAFRLTGF FLHRHVYEP-----RGIESVAARDGFVQAALKALN           | 242 |
| bsRecO | GNVSLKEETKAELKQVIDLYEEY-----SGLYLKSKRFLDQME-----                  | 244 |
| bpRecO | ----HRAQTVAQSKTLMRFL LNTYL-----GGTPLATRQILIDLQ-----               | 225 |
| ecRecO | ----PDADTLRAAKRFTRMAL KPYL-----GGKPLKSRELFRQFM-----               | 232 |
| vpRecO | ----VTKEQLKA AKRFTRIAL KPYL-----GGKPLKSRELFIQTP-----              | 236 |
| drRecO | VRASF EQPVPSADRPALWRALEKFVTVQVG VHSWRQLVPSGVPVLS-----             | 244 |
| bbRecO | VKHYLAN----A---TL-----                                            | 199 |
|        |                                                                   |     |
| cjRecO | -----                                                             | 204 |
| hpRecO | -----                                                             | 204 |
| rlRecO | PTPRTLSPNGVSA                                                     | 256 |
| bsRecO | -SMKHLMGENKS--                                                    | 255 |
| bpRecO | -NL-----                                                          | 227 |
| ecRecO | -PKRTVKTHYE---                                                    | 242 |
| vpRecO | -RARSNGK-----                                                     | 243 |
| drRecO | -----                                                             | 244 |
| bbRecO | -----                                                             | 199 |

**Figure S2.** Residue type-based sequence alignment of cjRecO, *H. pylori* RecO (hpRecO), *Rhizobium leguminosarum* RecO (rlRecO), *Bacillus subtilis* RecO (bsRecO), *Burkholderia pseudomallei* RecO (bpRecO), ecRecO, *Vibrio parahaemolyticus* RecO (vpRecO), drRecO, and *Bdellovibrio bacteriovorus* RecO (bbRecO). The Zn<sup>2+</sup>-coordinating residues of cjRecO and drRecO are colored red. The residues of RecO orthologs that are identical to those of cjRecO are highlighted by a cyan background. Residue type-based sequence alignment was performed using the Clustal Omega program [34].

# Figure S3

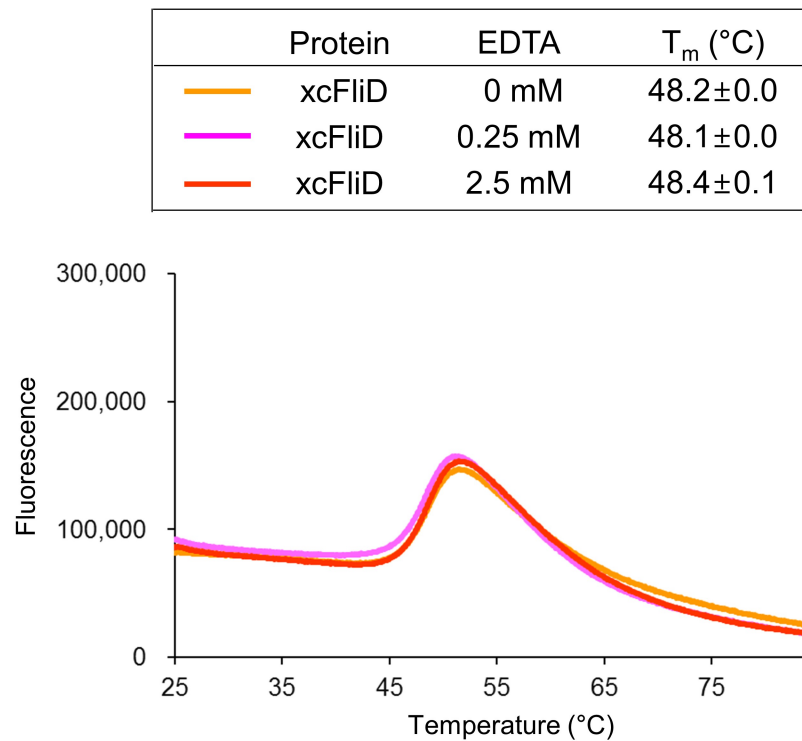

**Figure S3.** Thermal shift assay of the control protein xcFliD in the absence and presence of EDTA. EDTA did not change the protein stability of xcFliD, which does not have a metal-binding capacity. The data in the figure are representative of three independent experiments that yielded similar results.  $T_m$  values are shown as means  $\pm$  S.D. from the three independent experiments.

## Figure S4

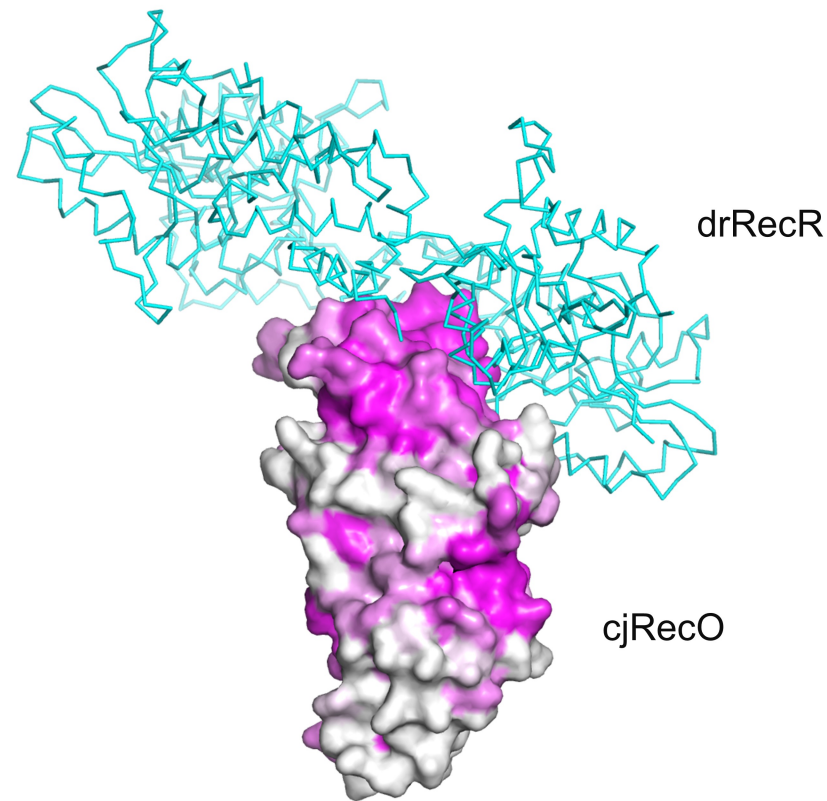

**Figure S4.** Sequence conservation of RecO proteins on the cjRecO structure in the backside view of Figure 5B. The cjRecO structure is shown as surfaces that represent the sequence conservation of cjRecO orthologs (high sequence conservation, magenta; low sequence conservation, white). The drRecR structure from the drRecO-drRecR complex (PDB ID 4JCV) is depicted as cyan  $\alpha$  traces with the cjRecO structure. The RecR-binding region of RecO exhibits high sequence conservation.
